# Supplementary material for: Pd(ii) nanoparticles in porous polystyrene: factors influencing the nanoparticle size and catalytic properties
Source: Royal Society of Chemistry journal article supplement (doi:10.1039/c2jm30634d), 2012-01-01
Supplement: c2jm30634d.pdf [file c2jm30634d.pdf]

## Electronic Supplementary Information

# Pd(II) Nanoparticles in Porous Polystyrene: Factors Influencing the Nanoparticle Size and Catalytic Properties

*Irina B. Tsvetkova, Valentina G. Matveeva, Valentin Y. Doluda, Alexei V. Bykov, Alexander I. Sidorov, Sergey V. Schennikov, Michael G. Sulman, Pyotr M. Valetsky, Barry D. Stein, Chun-Hsing Chen, Esther M. Sulman, Lyudmila M. Bronstein*

## Catalytic reaction

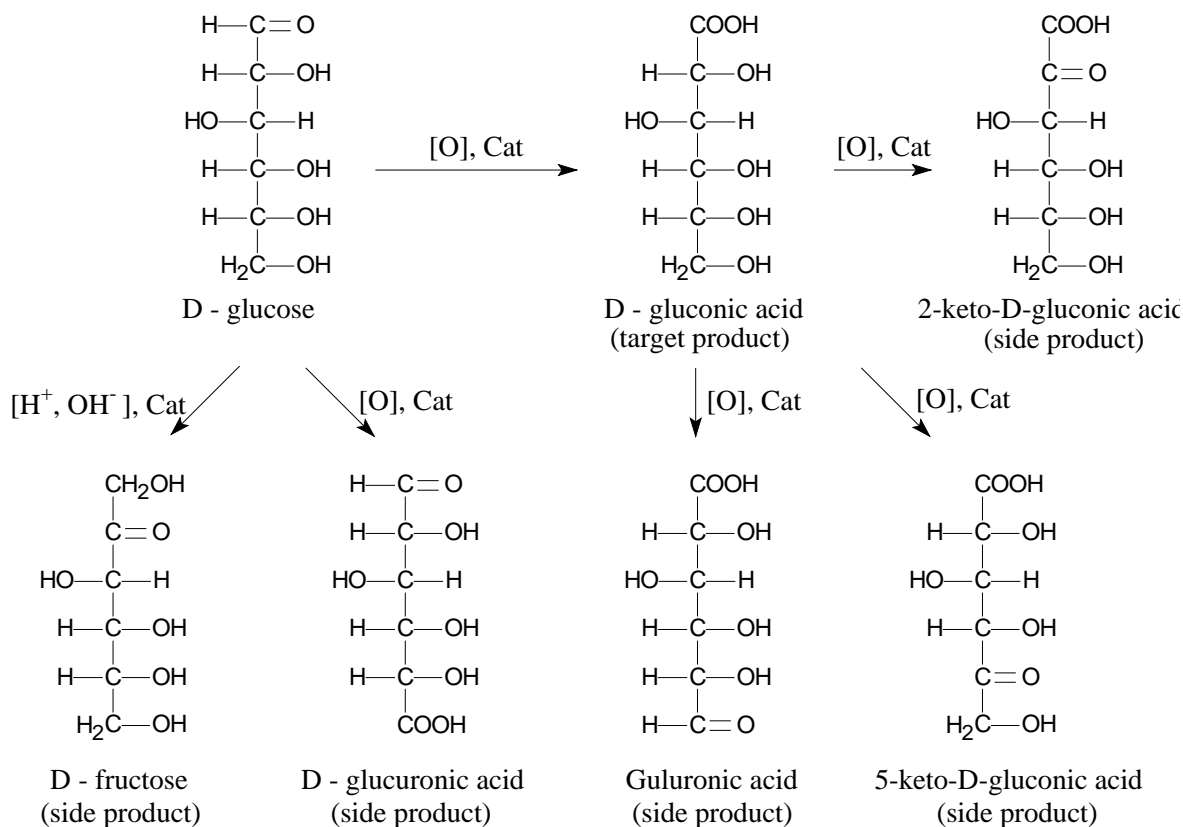

**Scheme S1.** Direct catalytic D-glucose oxidation and possible side products (lower level).

## Incorporation of $\text{Na}_2\text{PdCl}_4$ in HPS

In a typical procedure, 22.8 mg (0.078 mmol) of  $\text{Na}_2\text{PdCl}_4$  (98%, Sigma-Aldrich) was dissolved in a solvent mixture consisting of THF, water and methanol in the ratio 5:1:1, to which 0.5 g of HPS was added. The suspension was continuously stirred for 10 min so that the solution could be absorbed by the polymer, which was then dried at 75 °C for 1 h. The sample was then washed with deionized water three times and dried at 75 °C under vacuum and stored under nitrogen.

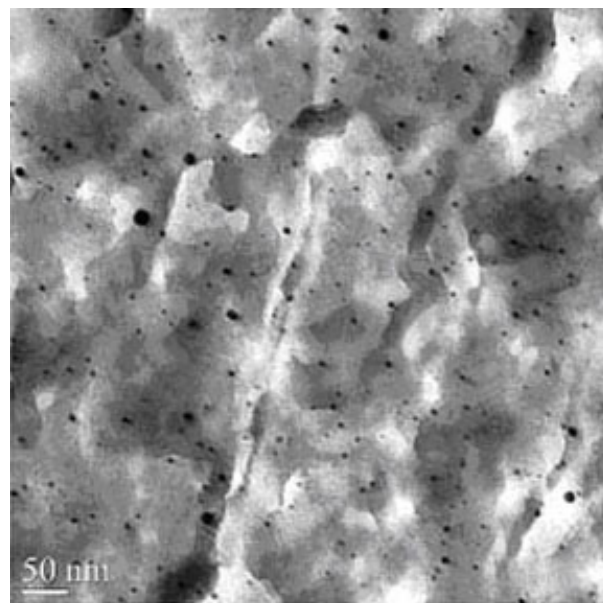

**Figure S1.** TEM image of HPS impregnated with  $\text{Na}_2\text{PdCl}_4$ .

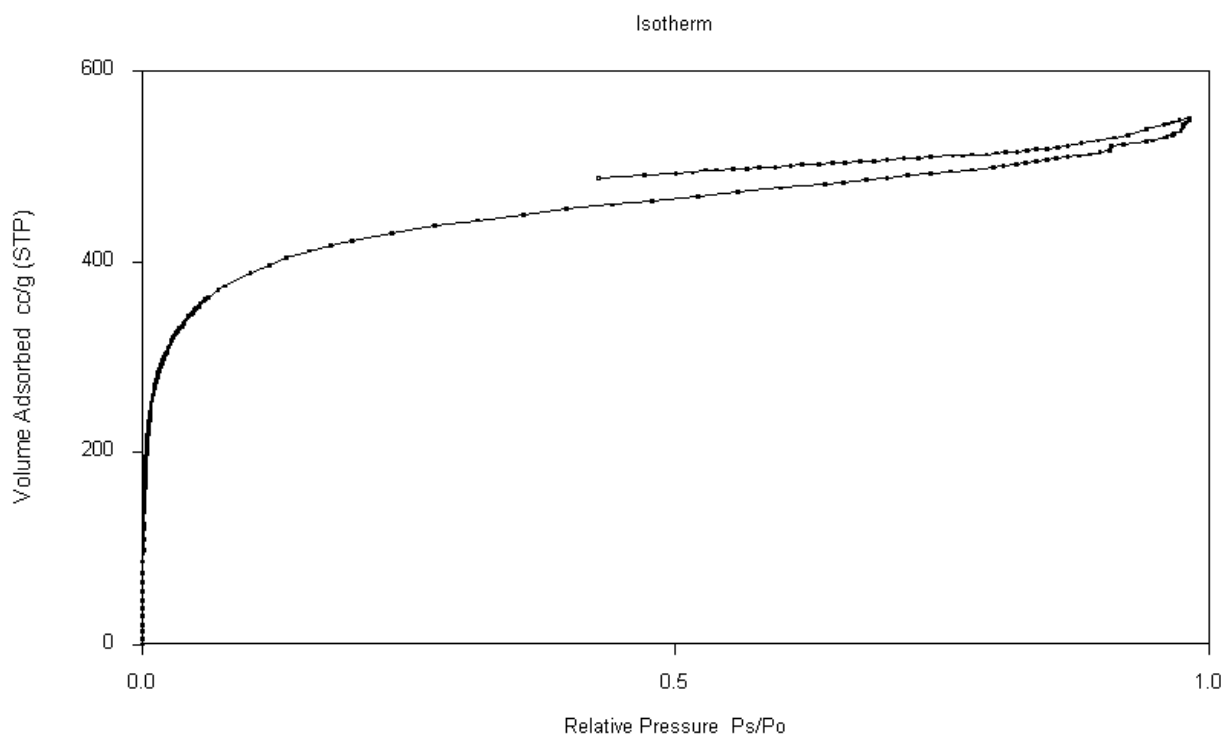

a

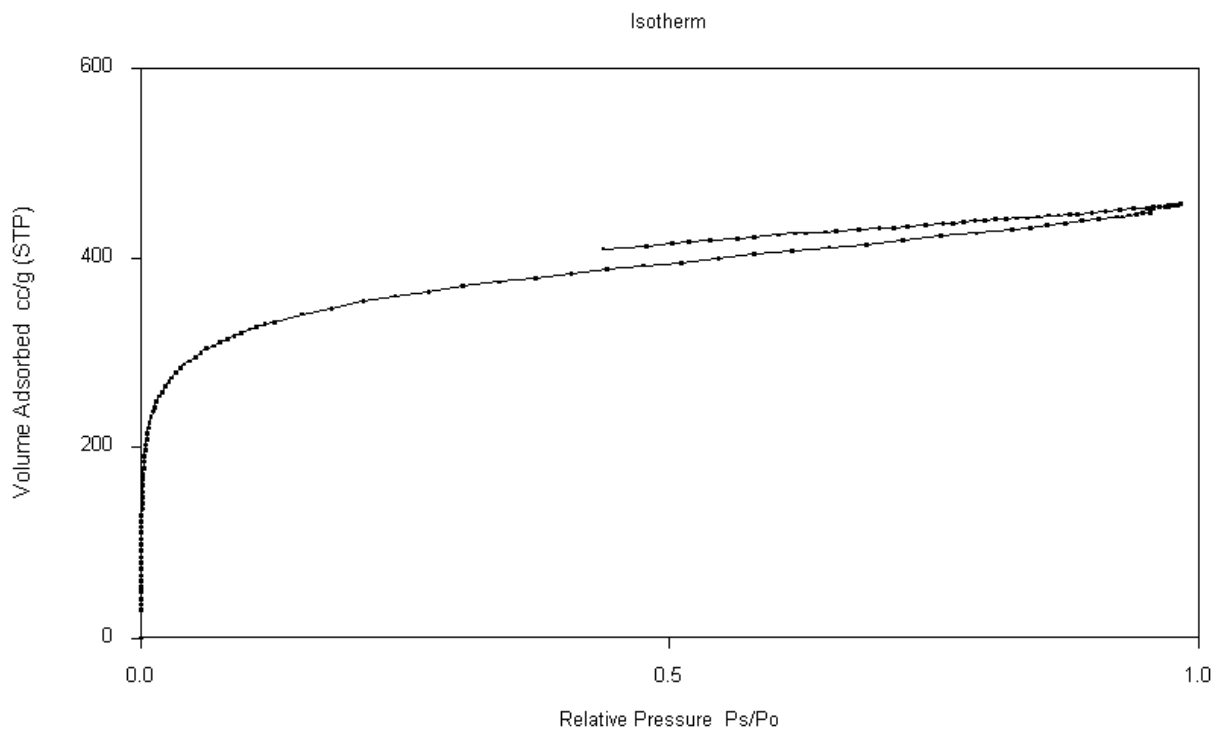

**b**

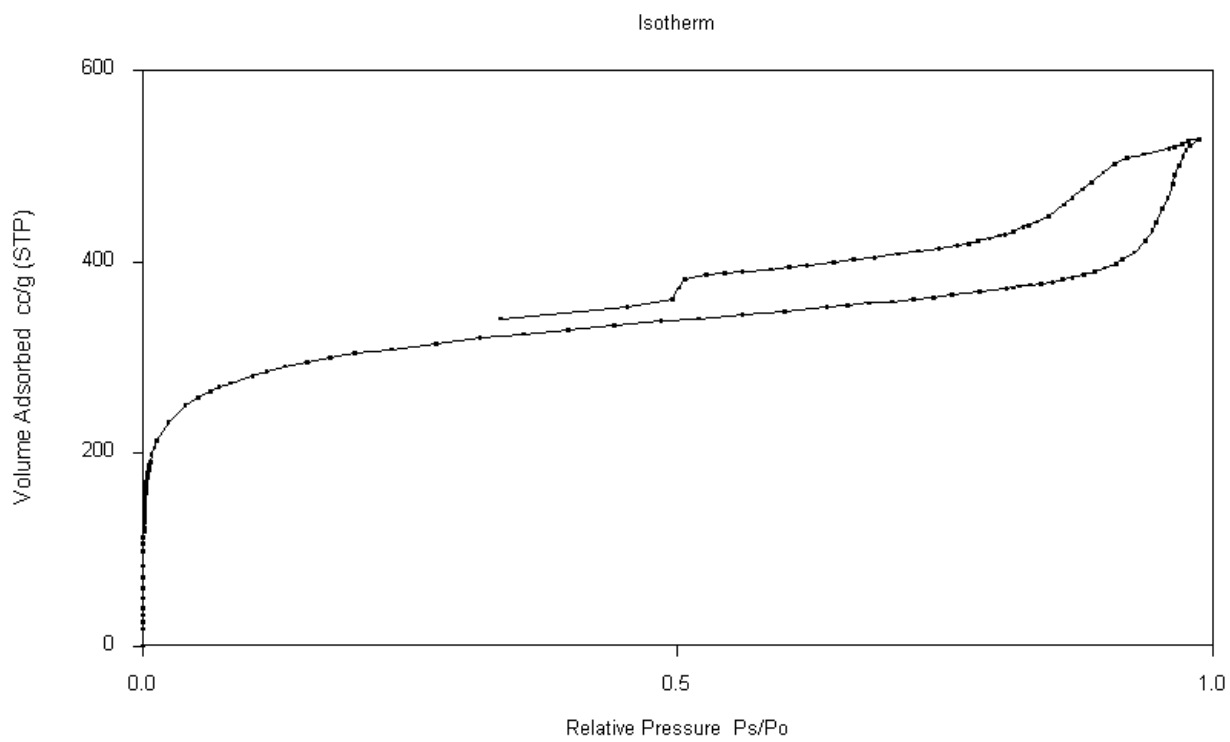

**c**

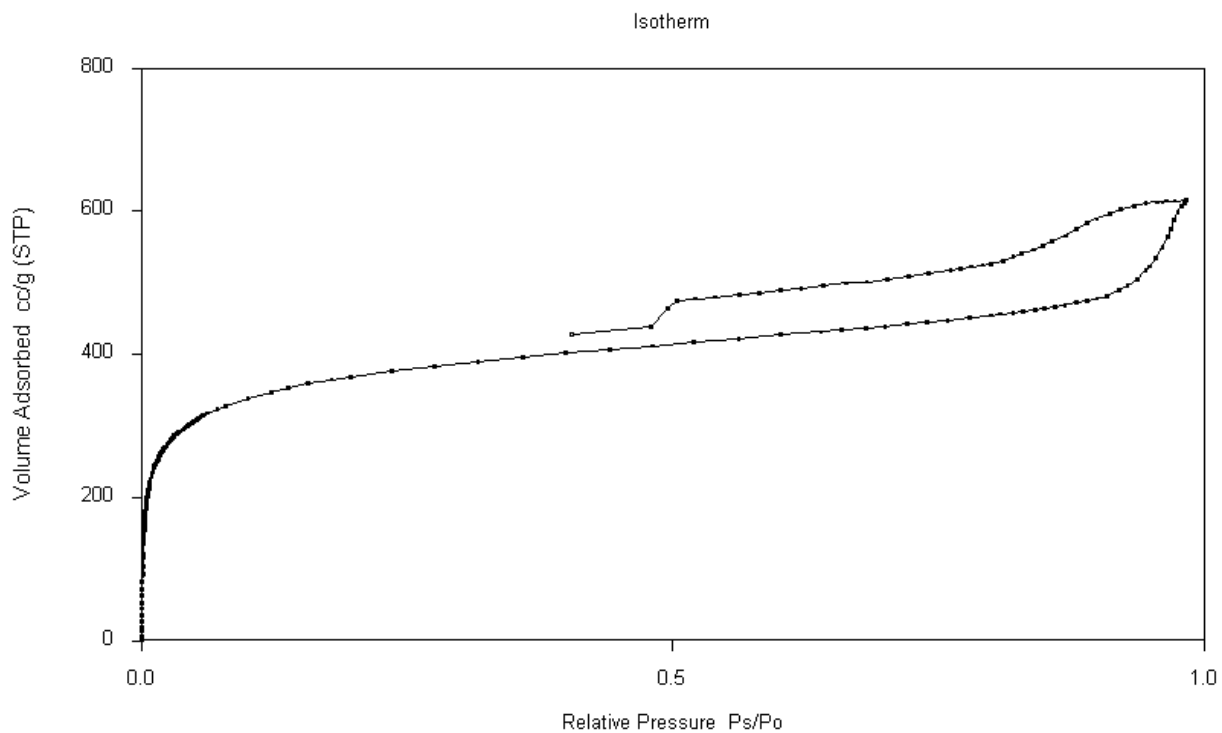

d

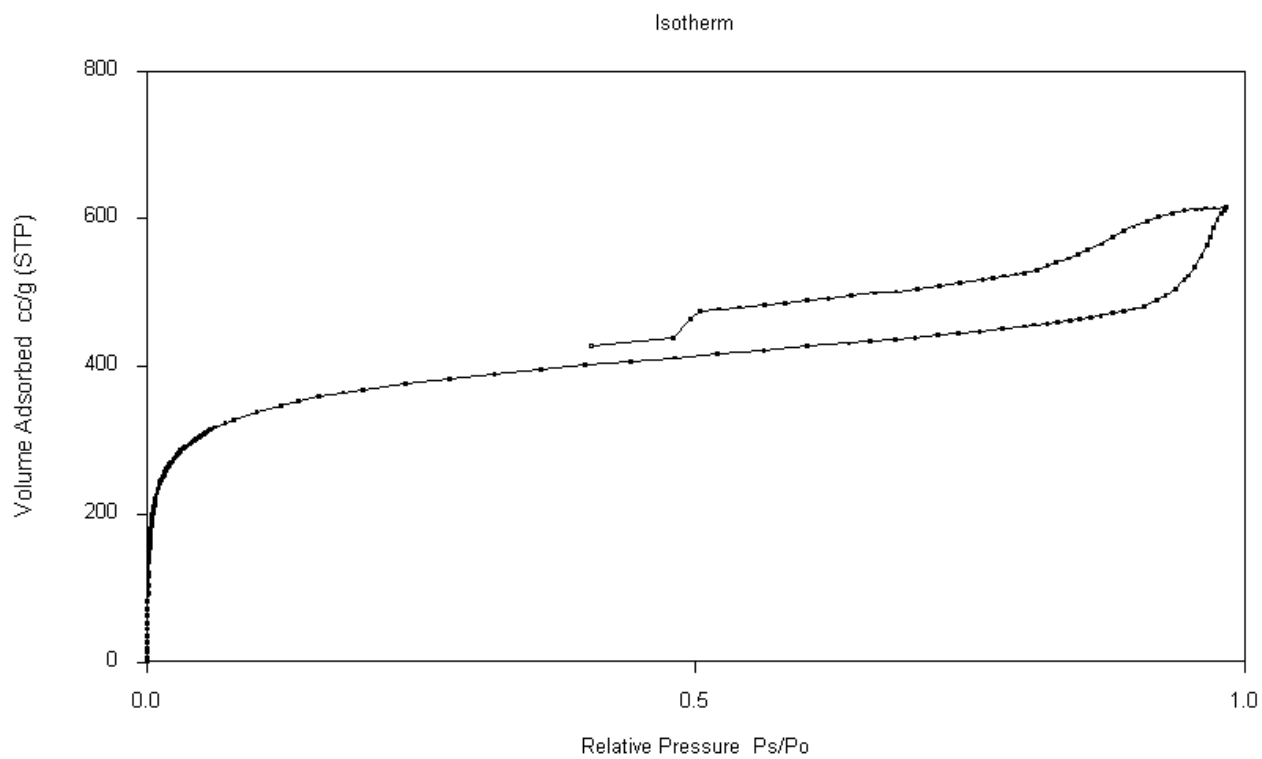

e

**Figure S2.** N<sub>2</sub> adsorption-desorption isotherms of HPS (a), HPS-Pd1 (b), HPS-Pd2 (c), HPS-Pd3 (d), and HPS-Pd4 (e). Mismatch of adsorption and desorption isotherms is due to significant presence of micropores.<sup>1</sup>

(1) Sing, K. S. W.; Everett, D. H.; Haul, R. A. W.; Moscou, L.; Pierotti, R. A.; Rouquerol, J.; Siemieniewska, T. In *Handbook of Heterogeneous Catalysis*; 2nd ed.; Ertl, G., Knözinger, H., Schüth, F., Weitkamp, J., Eds.; Wiley-VCH Verlag GmbH & Co: Weinheim, 2008; Vol. 2, p 1217.
